# Supplementary material for: Germline masculinization by Phf7 in D. melanogaster requires its evolutionarily novel C-terminus and the HP1-family protein HP1D3csd
Source: PubMed Central journal article supplement (PMC7973481; doi:10.1038/s41598-021-85560-4), 2021-03-18
Supplement: 41598_2021_85560_MOESM1_ESM.pdf [file 41598_2021_85560_MOESM1_ESM.pdf]

Germline masculinization by *Phf7* in *D. melanogaster* requires its evolutionarily novel C-terminus and the *HP1*-family protein HP1D3csd

Shu Yuan Yang

Supplementary Figures

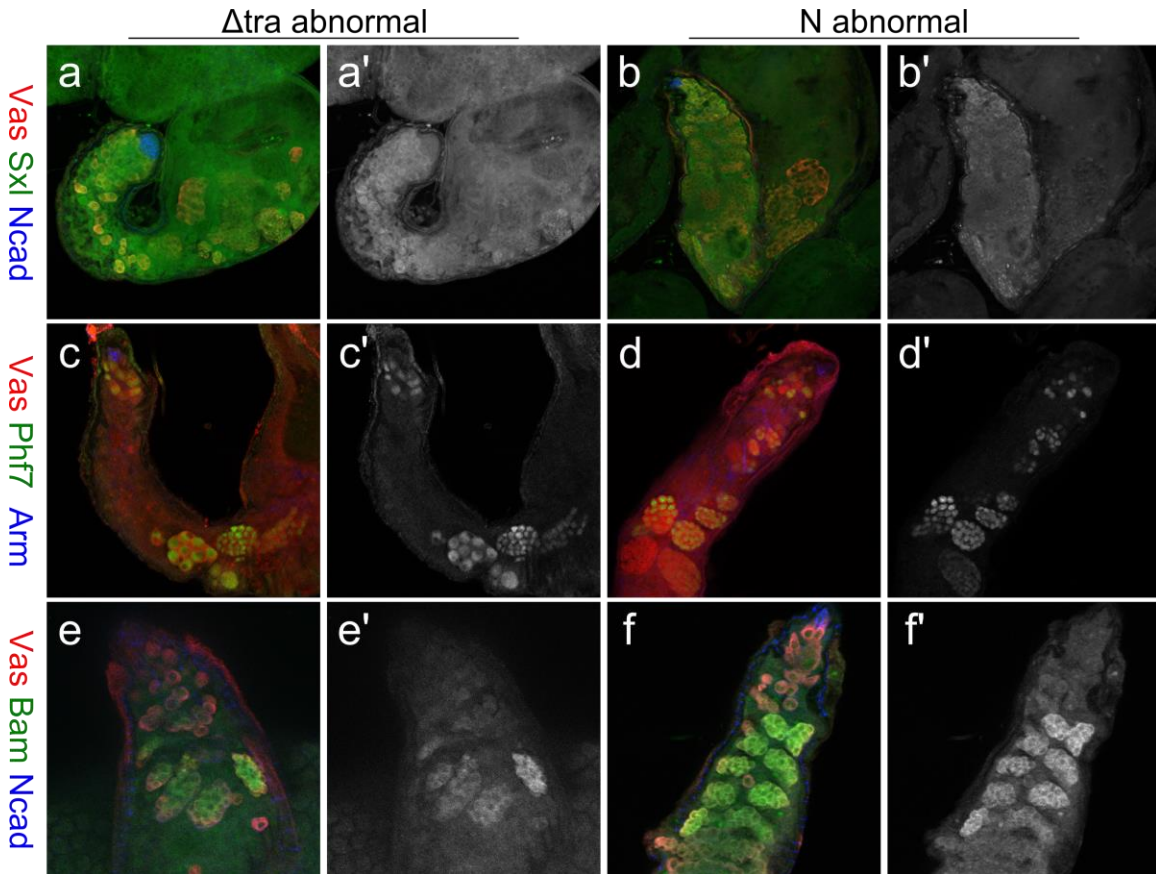

**Supplementary Figure 1. Expression analysis of sex-specific factors in pseudotestes.** **a-b**, Sxl staining (green) together with Vasa (red) and N-cadherin (blue). **c-d**, Phf7 staining (green) along with Vasa (red) and N-cadherin (blue). **e-f**, Bam staining (green) in addition to Vasa (red) and N-cadherin (blue). **a, c, e**,  $\Delta tra/tra^1$ , *nos-Gal4*, **b, d, f**, *UAS-Phf7.N*,  $\Delta tra/tra^1$ , *nos-Gal4*. **a'-b'**, **c'-d'**, and **e'-f'** depict signals from the green channels (Sxl, Phf7, and Bam, respectively) alone.

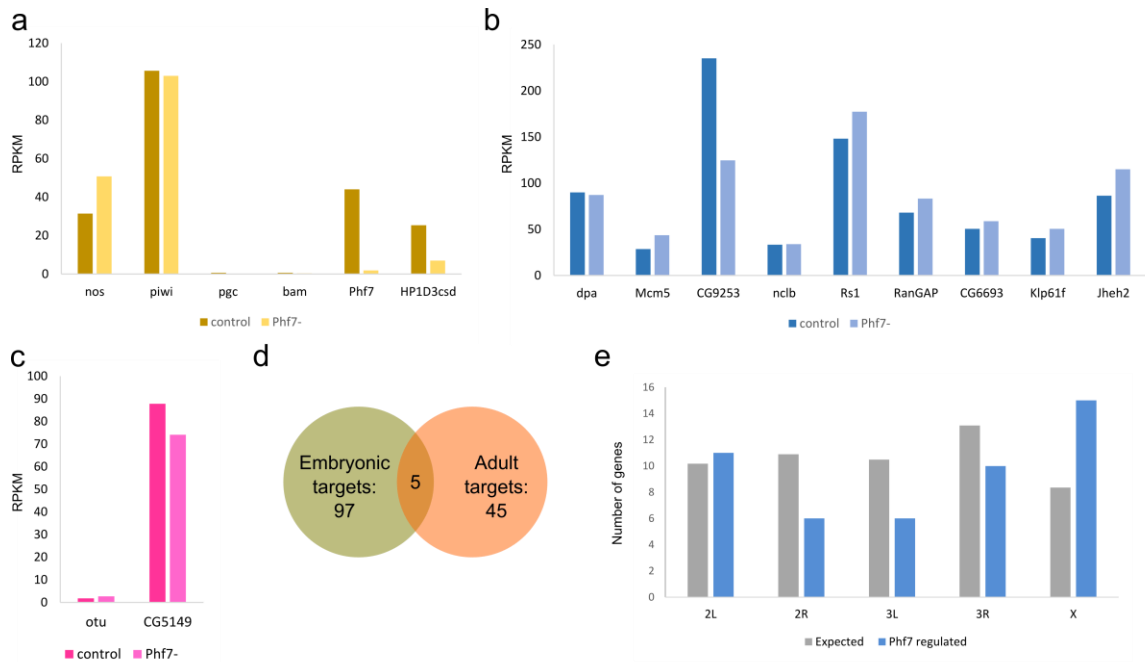

**Supplementary Figure 2. Summary of RNA-seq results.** **a**, Expression of various germline genes in the control (dark yellow) and *Phf7*-mutant (light yellow) embryonic gonads. **b**, Expression levels of genes enriched in the male late embryonic gonad in control (dark blue) and *Phf7*-mutant (light blue) samples. **c**, Expression levels of genes enriched in the female late embryonic gonad of control (dark pink) and *Phf7*-mutant (light pink) genotypes. **d**, Venn diagram depicting the overlap between *Phf7*-regulated genes in the embryonic vs. adult germline. **e**, Chromosomal distribution of the adult *Phf7* target dataset from a previous study<sup>9</sup>. Gray bars indicate the expected number of genes on each chromosome in the absence of any bias. Blue bars designate the observed distribution.

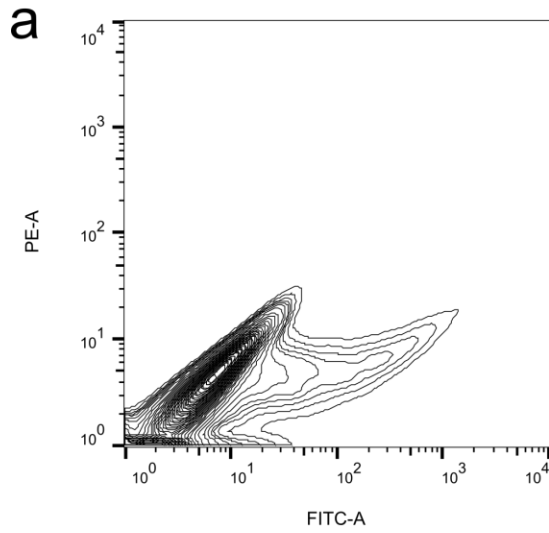

UbiP: GAL4  
+  
UAS: GFP

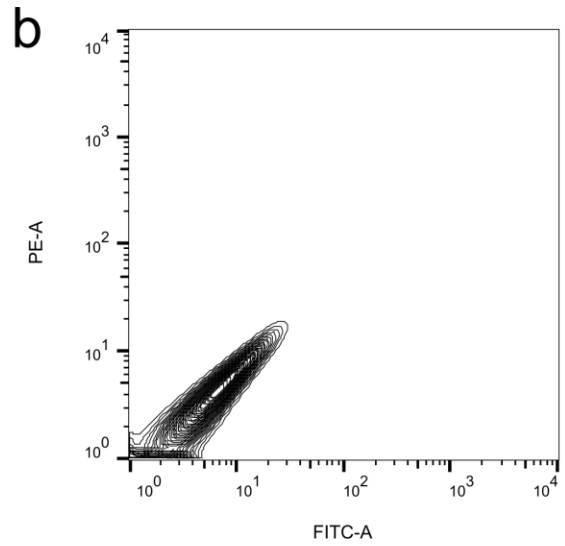

UbiP: GAL4 DBD-PHF7 CTD  
+  
UAS: GFP

**Supplementary Figure 3. FACS profiles of S2 cells transfected with different reporter constructs after 48 hours.** **a**, S2 cells transfected with *UbiP-Gal4* and *UAS-GFP* show a clear GFP+ cell population. **b**, S2 cells transfected with *UbiP-Gal4 DBD/PHF7.C* fusion construct together with *UAS-GFP* cannot promote GFP expression.
